# Supplementary figures and images for: Diclofenac: A Nonsteroidal Anti-Inflammatory Drug Inducing Cancer Cell Death by Inhibiting Microtubule Polymerization and Autophagy Flux
Source: MDPI journal article supplement (doi:10.3390/antiox11051009), 2022-05-20

**Figure S1. Uncropped western blots related with Figure 3E**

**LC3(16,18kDa)**

**p62(62kDa)**

**mTOR(289kDa)**

**Actin(42kDa)**

1SET

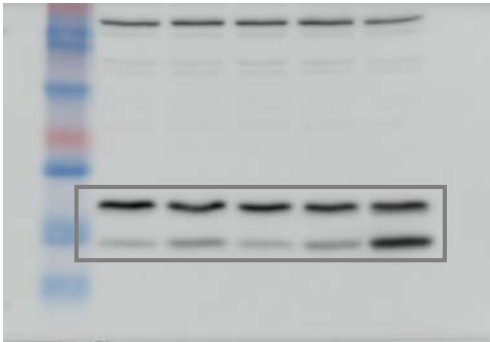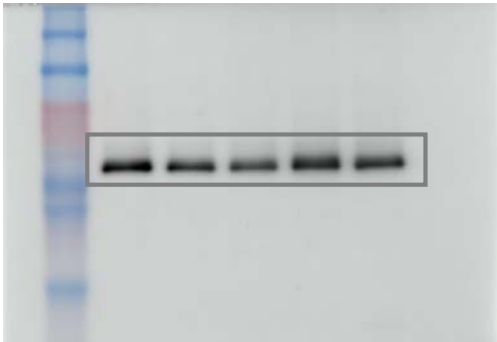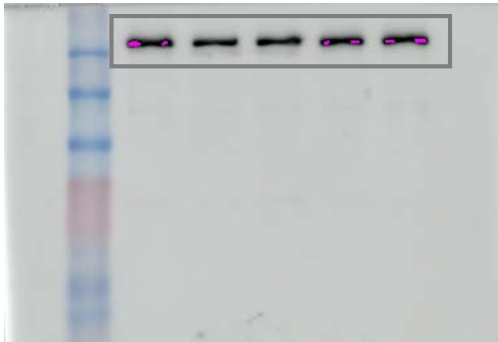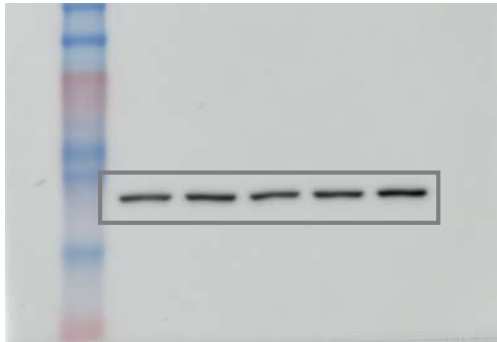

2SET

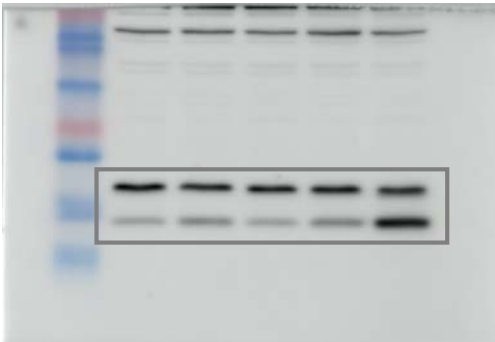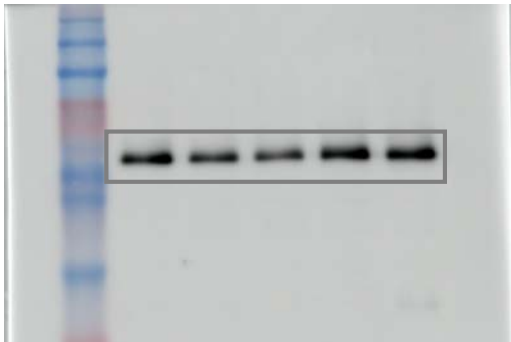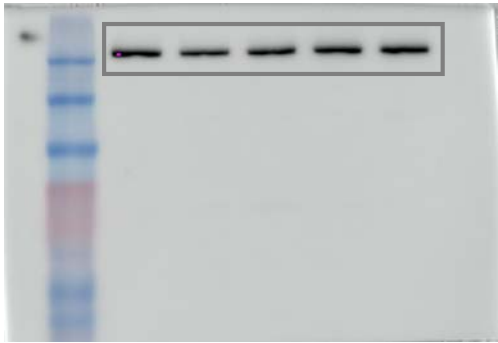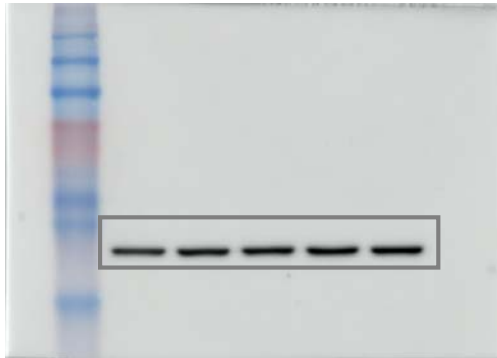

3SET

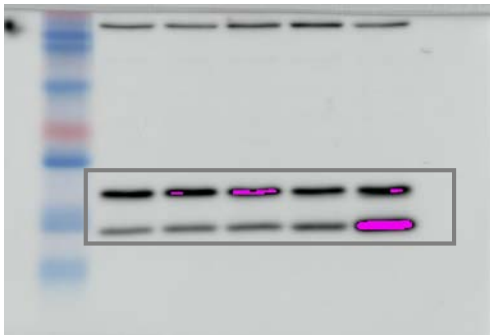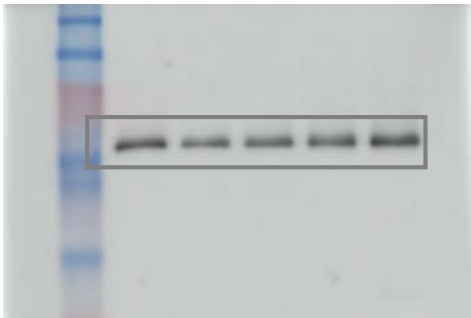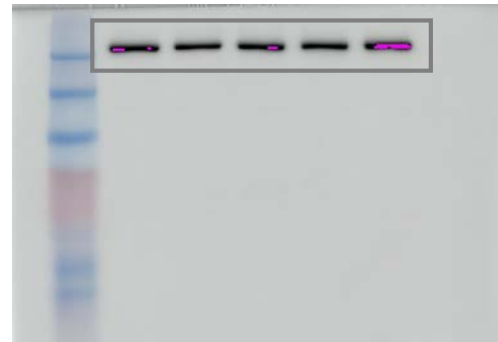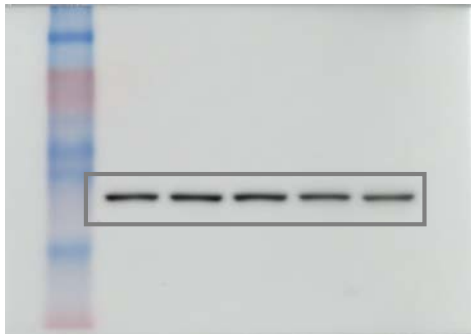

Supplement: s1 [file s1]
